# Supplementary material for: Variation and trend of nitrate radical reactivity towards volatile organic compounds in Beijing, China
Source: Copernicus journal article supplement (doi:10.5194/acp-23-8211-2023), 2023-07-25
Supplement: Supplementary file 1 [file acp-23-8211-2023-supplement.zip]

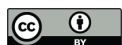

*Supplement of*

**Variation and trend of nitrate radical reactivity towards  
volatile organic compounds in Beijing, China**

**Hejun Hu et al.**

*Correspondence to:* Haichao Wang (wanghch27@mail.sysu.edu.cn) and Keding Lu (k.lu@pku.edu.cn)

- acp-23-8211-2023-supplement-title-page.pdf
- SI-0529.docx
- SI-list-VOC-data-Beijing-final.xlsx

The copyright of individual parts of the supplement might differ from the article licence.
